# Supplementary material for: Parkinson disease
Source: Springer Nature journal article supplement (doi:10.1038/nrdp.2017.13), 2017-03-22
Supplement: 41572_2017_BFnrdp201713_MOESM294_ESM.pdf [file 41572_2017_BFnrdp201713_MOESM294_ESM.pdf]

**Supplementary table 1: Imaging biomarkers for used to study Parkinson disease**

| Target (technique and/or marker)                                                                                                                                                                                                                                                                                                                             | Findings in Parkinson disease                                                                                                                                           | Diagnostic potential                                                                                                                                              | Research setting                                                                                                                                                                                                                                                  |
|--------------------------------------------------------------------------------------------------------------------------------------------------------------------------------------------------------------------------------------------------------------------------------------------------------------------------------------------------------------|-------------------------------------------------------------------------------------------------------------------------------------------------------------------------|-------------------------------------------------------------------------------------------------------------------------------------------------------------------|-------------------------------------------------------------------------------------------------------------------------------------------------------------------------------------------------------------------------------------------------------------------|
| Presynaptic nigrostriatal neuron integrity (different PET and SPECT tracers, which asses DDC activity (for example, <sup>18</sup> F-DOPA PET), DAT availability (for example, <sup>123</sup> I-ioflupane SPECT, <sup>99m</sup> Tc-TRODAT SPECT, <sup>18</sup> F-CFT PET, <sup>11</sup> C-MP PET) or VMAT-2 activity (for example, <sup>11</sup> C-DTBZ PET)) | Decreased (affecting caudal more than rostral striatum) due to nigrostriatal dopaminergic denervation                                                                   | Early and differential diagnosis (for example, non-degenerative parkinsonism or tremor, which is not associated with Parkinson disease)                           | Sensitive to disease progression and a marker for prodromal disease (for example, RBD and asymptomatic <i>LRRK2</i> carriers)                                                                                                                                     |
| Striatal dopamine D2/D3 receptors (different PET and SPECT tracers: for example, <sup>123</sup> I-IBZM SPECT, <sup>18</sup> F-fallypride PET, <sup>11</sup> C-raclopride PET)                                                                                                                                                                                | Binding increased in putamen in untreated patients with normalisation or slight decrease on dopaminergic treatment                                                      | Reduced binding in atypical parkinsonism, but suboptimal diagnostic accuracy                                                                                      | Receptor occupancy studies with dopaminergics                                                                                                                                                                                                                     |
| Myocardial postganglionic sympathetic innervation (different tracers: for example <sup>123</sup> I-metaiodobenzylguanidine szintigraphy, <sup>11</sup> C-metahydroxyephedrine PET, <sup>18</sup> F-dopamine PET)                                                                                                                                             | Decreased cardiac uptake, but normal cardiac sympathetic innervation in early stages of Parkinson disease may occur                                                     | Differential diagnosis (for example, atypical parkinsonism or non-degenerative parkinsonism); results may be confounded by cardiac co-morbidity and several drugs | Marker for prodromal Parkinson disease (for example RBD)                                                                                                                                                                                                          |
| Glucose metabolism (FDG-PET)                                                                                                                                                                                                                                                                                                                                 | (Relative) hypermetabolism in putamen and pallidum and, possibly, thalamus and cerebellum                                                                               | Early and differential diagnosis (for example, essential tremor or atypical parkinsonism)                                                                         | Global functional level spatial covariance analysis reveals a specific Parkinson disease-related spatial covariance pattern (PDRP) of metabolic alterations, which is progression marker, marker for prodromal disease and surrogate marker for treatment effects |
| Nigral echogenicity (transcranial brain parenchyma sonography)                                                                                                                                                                                                                                                                                               | Hyperechogenicity in the area of the substantia nigra (can be found in up to 23% of healthy controls)                                                                   | Early and differential diagnosis (for example, atypical parkinsonism or non-degenerative parkinsonism)                                                            | Risk marker for developing Parkinson disease and marker for prodromal Parkinson disease (for example, RBD and asymptomatic <i>LRRK2</i> carriers)                                                                                                                 |
| Brain structure (routine sequences of MRI)                                                                                                                                                                                                                                                                                                                   | No disease-specific changes in PD, especially in the early disease stages, but mild cortical atrophy involving hippocampal and frontal structures as disease progresses | Diagnosis of symptomatic parkinsonism due to underlying central nervous system pathologies and support differential diagnosis vs. atypical parkinsonism           | Characterisation of subtypes and progression of Parkinson disease (for example, grey matter volume analysis, cortical thickness measurements, cortical gyrification)                                                                                              |
| Dorsolateral nigral hyperintensity (DNH) (specific iron-sensitive sequences)                                                                                                                                                                                                                                                                                 | Loss of DNH, which is suggested to reflect degeneration of nigrosome 1 (also called "swallow tail"-sign)                                                                | Early diagnosis (investigational)                                                                                                                                 | Diagnostic marker for Parkinson disease and marker for prodromal Parkinson disease (for example, RBD and asymptomatic <i>LRRK2</i> carriers)                                                                                                                      |
| Iron accumulation (specific iron-sensitive sequences)                                                                                                                                                                                                                                                                                                        | Increased nigral iron content                                                                                                                                           | Differential diagnosis (increased putaminal iron content can help to discriminate atypical parkinsonism vs. Parkinson disease)                                    | Potential diagnostic marker for Parkinson disease                                                                                                                                                                                                                 |

|                                                                                              |                                                                                                                                                       |                                                                                                                     |                                                                         |
|----------------------------------------------------------------------------------------------|-------------------------------------------------------------------------------------------------------------------------------------------------------|---------------------------------------------------------------------------------------------------------------------|-------------------------------------------------------------------------|
| Nigral neuromelanin content (neuromelanin-sensitive MR sequences)                            | Reduced size, volume and signal intensity of the substantia nigra                                                                                     | Early diagnosis (investigational)                                                                                   | Diagnostic and progression marker for Parkinson disease                 |
| Diffusion metrics (diffusion imaging)                                                        | Abnormal nigral diffusion metrics                                                                                                                     | Differential diagnosis vs. atypical parkinsonism (abnormal diffusivity in putamen and/or infratentorial structures) | Diagnostic and progression marker for Parkinson disease                 |
| Complementary brain tissue changes (multimodal MRI) <sup>b</sup>                             | Abnormal nigral diffusion metrics and abnormal nigral iron content                                                                                    | Currently not established                                                                                           | Diagnostic marker for Parkinson disease                                 |
| Connectivity (structural with tractography and functional with resting state functional MRI) | Reduced structural connectivity of the substantia nigra with the basal ganglia and decreased coupling in different nigral and striatal brain networks | Currently not established                                                                                           | Diagnostic marker and characterisation of subtypes of Parkinson disease |

CFT= 2β-carbomethoxy-3β-(4-fluorophenyl)tropane; DAT= dopamine transporter; DDC= dopa decarboxylase; DTBZ=dihydrotetrabenazine; IBZM=iodobenzamide; MP= d-threo-methylphenidate; RBD=REM sleep behaviour disorder; TRODAT=2[[2-[[[3-(4-chlorophenyl)-8-methyl-8-azabicyclo[3,2,1]-oct-2-yl]-methyl](2-mercaptoethyl) amino]ethyl]amino]ethane-thiolato(3-)-N2,N2',S2,S2]oxo-[1R-(exo-exo)]; VMAT-2= vesicular monoamine transporter 2
